# Supplementary material
Source: PubMed Central journal article supplement (PMC10782845)
Supplement: NIHMS1951698-supplement-Supplemental_Data.pdf [file NIHMS1951698-supplement-Supplemental_Data.pdf]

## Appendix A. Supplementary data

The following are the Supplementary data to this article:

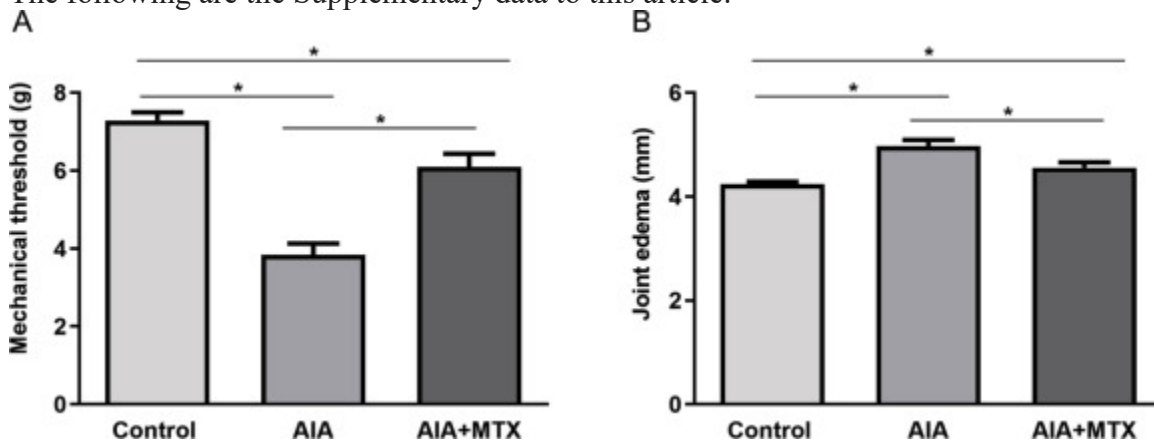

1. [Download : Download high-res image \(128KB\)](#)
2. [Download : Download full-size image](#)

Supplementary Figure 1. The graph shows the quantification of articular hyperalgesia of the femur-tibial joint (A) and the thickness of the knee joint in millimetres (B) measured 24 h after the last challenge in control mice, mice with antigen-induced arthritis (AIA), and AIA mice treated with methotrexate (MTX). Note: n = 5 animals per group; one-way ANOVA;  $p < 0.05$ .

Abundance

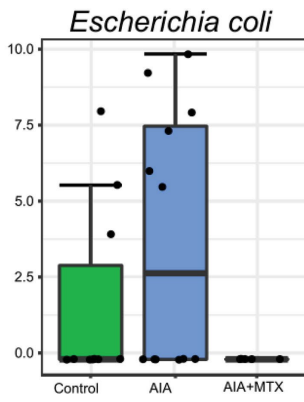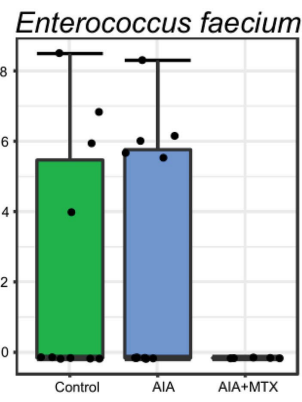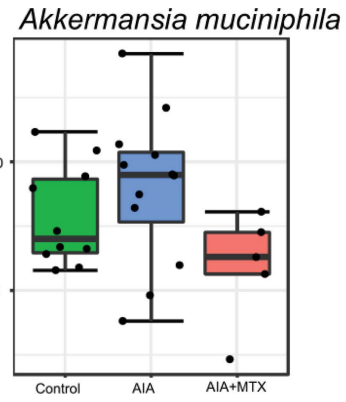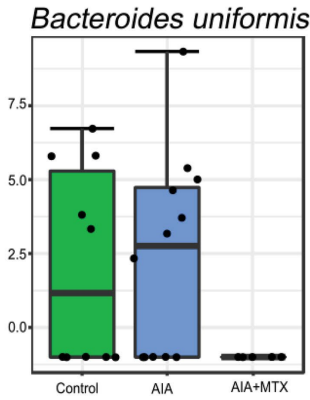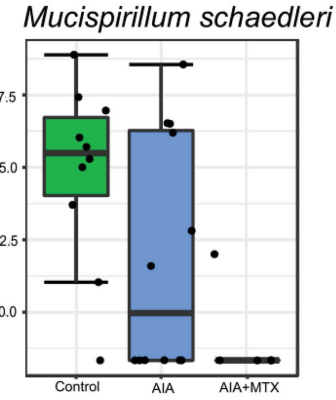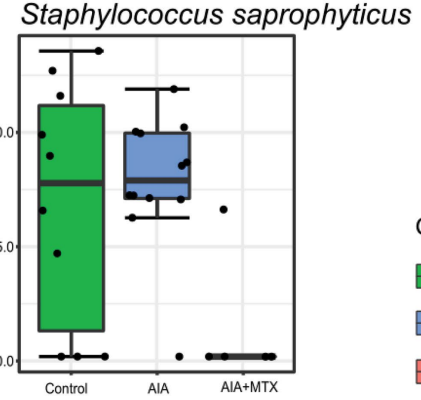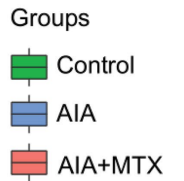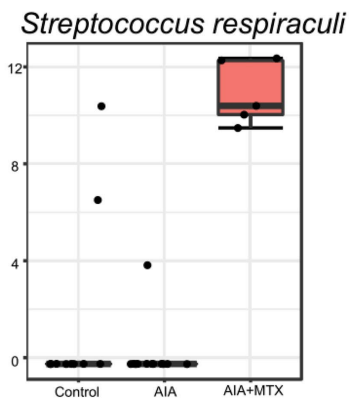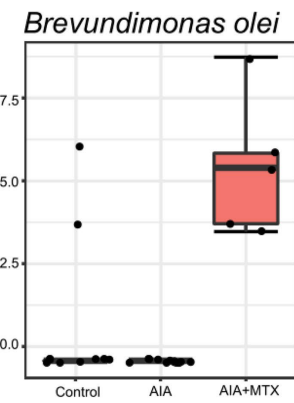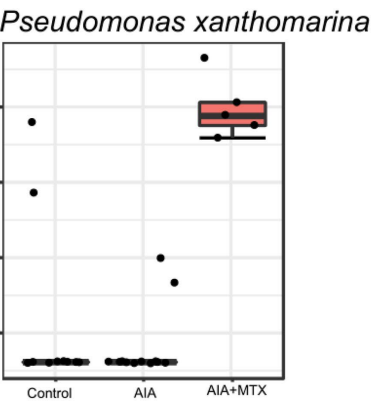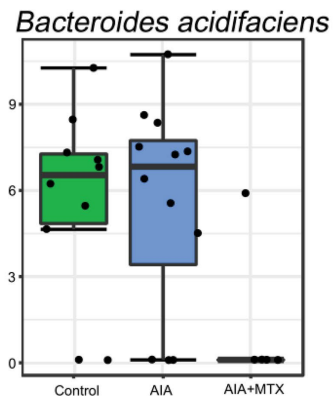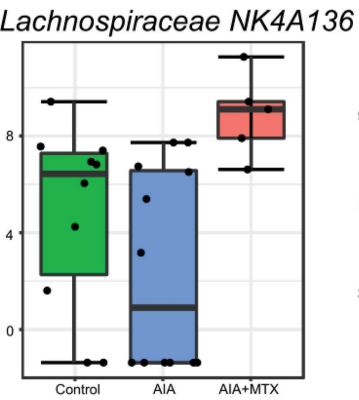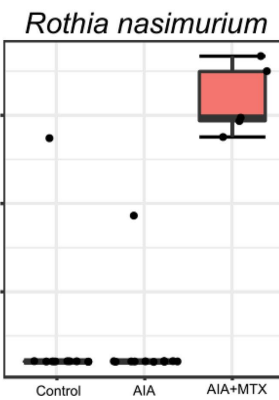

Download : [Download high-res image \(932KB\)](#)

1. [Download full-size image](#)

Supplementary Figure 2. Differentially abundant taxa at the species level with a statistically significant p-value, DESeq analysis.

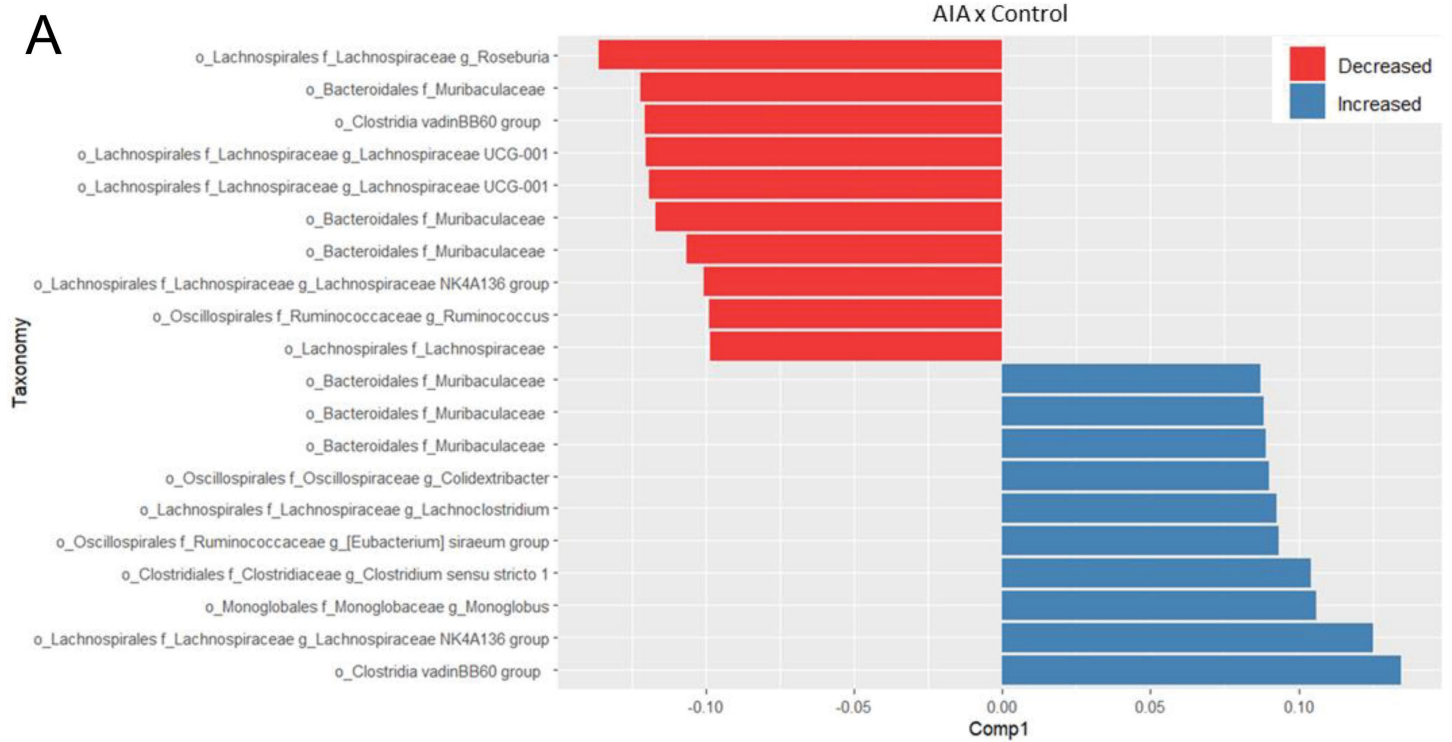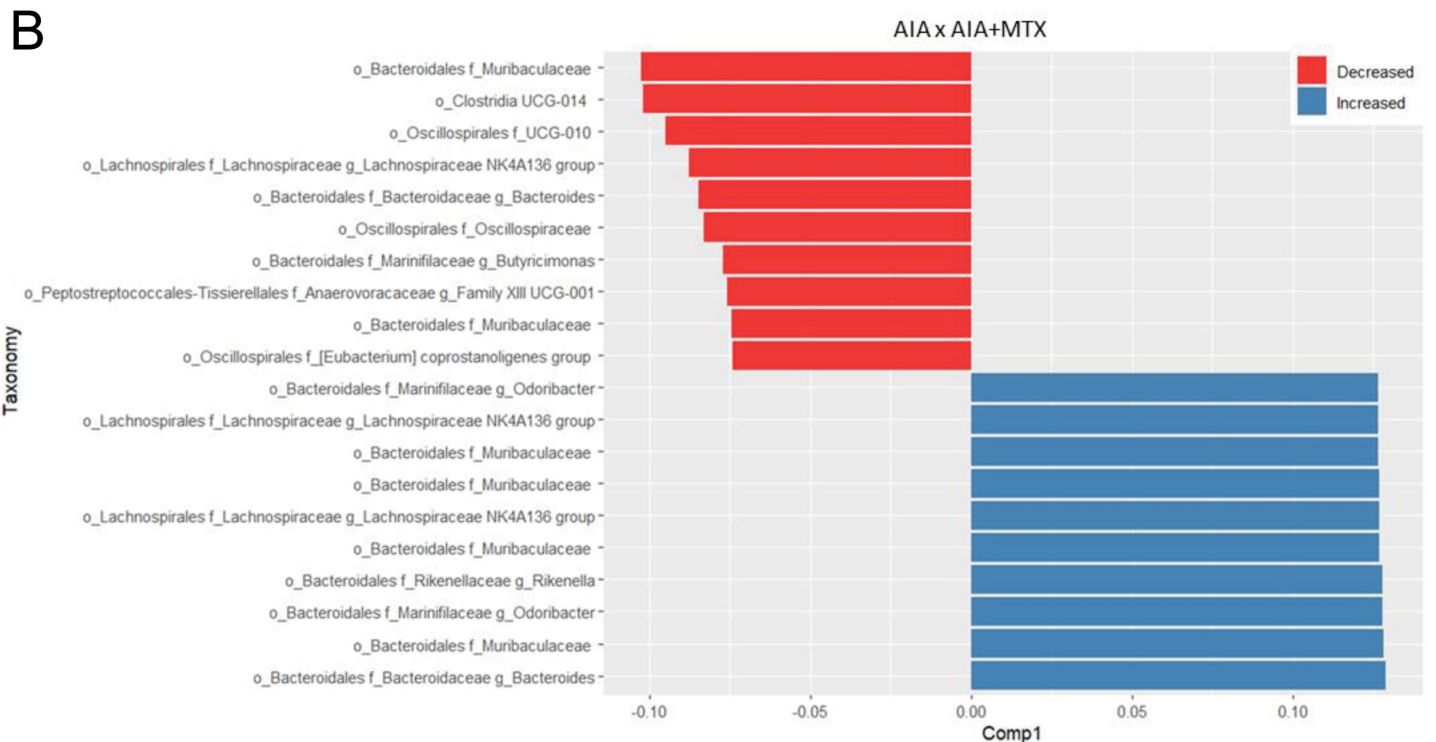

1. [Download : Download high-res image \(1015KB\)](#)
2. [Download : Download full-size image](#)

Supplementary Figure 3. (A) Graph depicting gut operational taxonomic units (OTU) with differences in relative abundance in the AIA group compared to control animals based on partial least squares-discriminant

analysis (PLSDA). (B) Graph depicting gut OTU with differences in relative abundance in the AIA + MTX group compared to AIA animals based on PLSDA results.

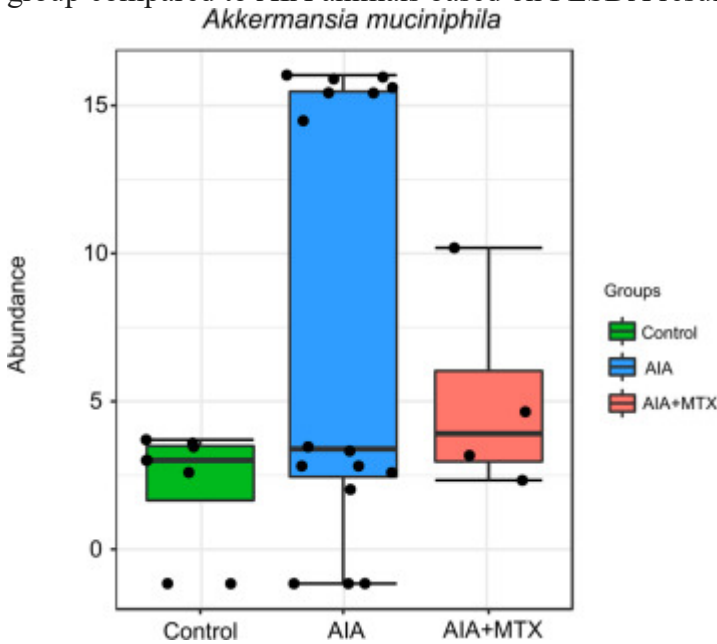

1. [Download : Download high-res image \(128KB\)](#)
2. [Download : Download full-size image](#)

Supplementary Figure 4. Differentially abundant gut taxa at the species level with a statistically significant p-value, DESeq analysis.

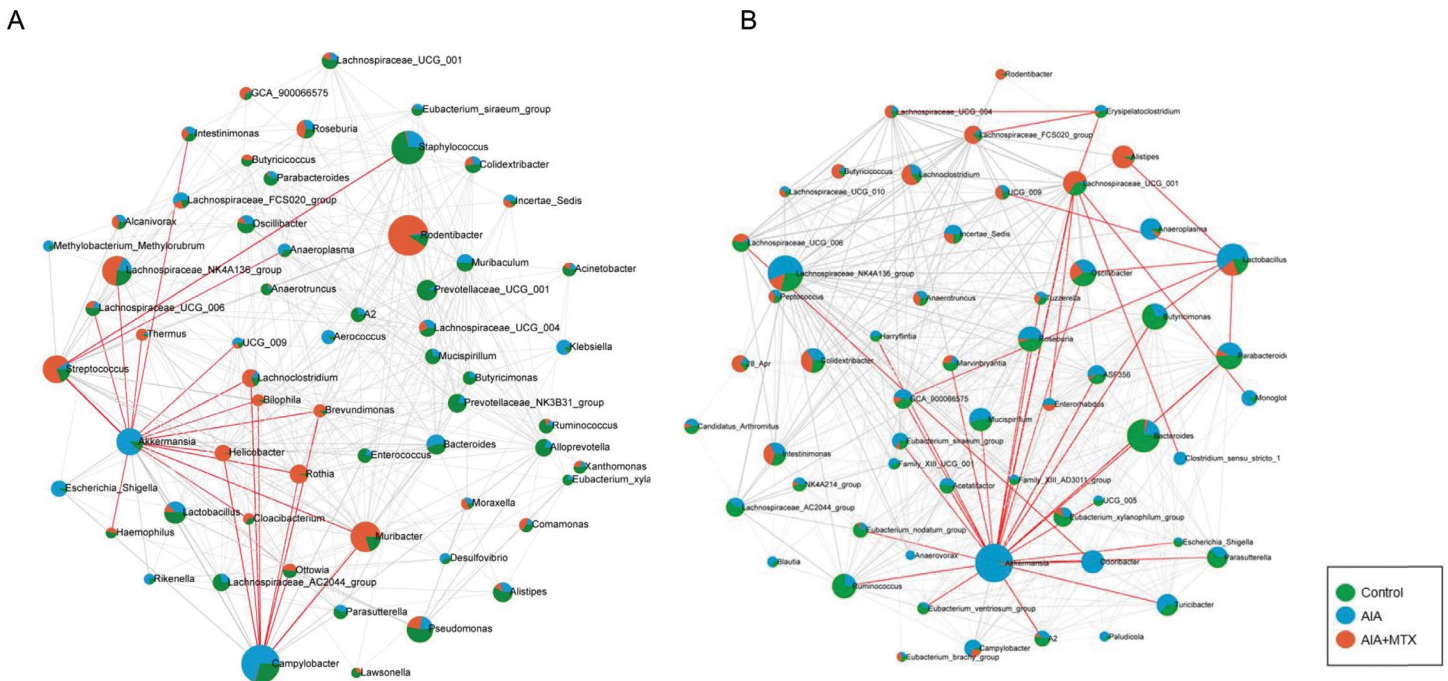

1. [Download : Download high-res image \(972KB\)](#)
2. [Download : Download full-size image](#)

Supplementary Figure 5. Co-occurrence network of microbial communities in (A) oral and (B) gut at the genus level. Note: the correlation among genera was calculated using Spearman rank correlation. The node size is based on the number of connections and coloured according to the abundance of groups, i.e., control (blue), AIA (green), and AIA + MTX (orange), and the edges represent a greater correlation than the threshold (correlation >0.3 and p value < 0.05). The edge size reflects the magnitude of correlation. Negative correlations are depicted in red and positive correlations in grey.

# References

1. [1]

J.S. Smolen, D. Aletaha, I.B. McInnes

Rheumatoid arthritis

Lancet, 388 (10055) (2016 Oct 22), pp. 2023-2038, [10.1016/S0140-6736\(16\)30173-8](https://doi.org/10.1016/S0140-6736(16)30173-8)

[View PDF](#)[View article](#)[View in Scopus](#)[Google Scholar](#)

2. [2]

J.U. Scher, C. Ubeda, M. Equinda, R. Khanin, Y. Buischi, A. Viale, L. Lipuma, M. Attur, M.H. Pillinger, G. Weissmann, D.R. Littman, E.G. Pamer, W.A. Bretz, S.B. Abramson

Periodontal disease and the oral microbiota in new-onset rheumatoid arthritis

Arthritis Rheum., 64 (10) (2012 Oct), pp. 3083-3094, [10.1002/art.34539](https://doi.org/10.1002/art.34539)

[View article](#)

[View in Scopus](#)[Google Scholar](#)

3. [3]

X. Zhang, D. Zhang, H. Jia, Q. Feng, D. Wang, D. Liang, X. Wu, J. Li, L. Tang, Y. Li, Z. Lan, B. Chen, Y. Li, H. Zhong, H. Xie, Z. Jie, W. Chen, S. Tang, X. Xu, X. Wang, X. Cai, S. Liu, Y. Xia, J. Li, X. Qiao, J.Y. Al-

Aama, H. Chen, L. Wang, Q.J. Wu, F. Zhang, W. Zheng, Y. Li, M. Zhang, G. Luo, W. Xue, L. Xiao, J. Li, W. Chen, X. Xu, Y. Yin, H. Yang, J. Wang, K. Kristiansen, L. Liu, T. Li, Q. Huang, Y. Li, J. Wang

The oral and gut microbiomes are perturbed in rheumatoid arthritis and partly normalized after treatment

Nat. Med., 21 (8) (2015 Aug), pp. 895-905, [10.1038/nm.3914](https://doi.org/10.1038/nm.3914)

[View article](#)

[View in Scopus](#)[Google Scholar](#)

4. [4]

I. Lopez-Oliva, A.D. Paropkari, S. Saraswat, S. Serban, Z. Yonel, P. Sharma, P. de Pablo, K. Raza, A. Filer, I. Chapple, T. Dietrich, M.M. Grant, P.S. Kumar

Dysbiotic subgingival microbial communities in periodontally healthy patients with rheumatoid arthritis

Arthritis Rheumatol., 70 (7) (2018 Jul), pp. 1008-1013, [10.1002/art.40485](https://doi.org/10.1002/art.40485)

[View article](#)

[View in Scopus](#)[Google Scholar](#)

5. [5]

J.D. Corrêa, G.R. Fernandes, D.C. Calderaro, S.M.S. Mendonça, J.M. Silva, M.L. Albiero, F.Q. Cunha, E. Xiao, G.A. Ferreira, A.L. Teixeira, C. Mukherjee, E.J. Leys, T.A. Silva, D.T. Graves

Oral microbial dysbiosis linked to worsened periodontal condition in rheumatoid arthritis patients

Sci. Rep., 9 (1) (2019 Jun 10), p. 8379, [10.1038/s41598-019-44674-6](https://doi.org/10.1038/s41598-019-44674-6)

[\\_View PDF\\_](#)

This article is free to access.

[View in Scopus](#)[Google Scholar](#)

6. [6]

Y. Hamamoto, K. Ouhara, S. Munenaga, M. Shoji, T. Ozawa, J. Hisatsune, I. Kado, M. Kajiya, S. Matsuda, T. Kawai, N. Mizuno, T. Fujita, S. Hirata, K. Tanimoto, K. Nakayama, H. Kishi, E. Sugiyama, H. Kurihara

Effect of Porphyromonas gingivalis infection on gut dysbiosis and resultant arthritis exacerbation in mouse model

Arthritis Res. Ther., 22 (1) (2020 Oct 19), p. 249, [10.1186/s13075-020-02348-z](https://doi.org/10.1186/s13075-020-02348-z)

[\\_View PDF\\_](#)

This article is free to access.

[View in Scopus](#)[Google Scholar](#)

7. [7]

K. Sato, N. Takahashi, T. Kato, Y. Matsuda, M. Yokoji, M. Yamada, T. Nakajima, N. Kondo, N. Endo, R. Yamamoto, Y. Noiri, H. Ohno, K. Yamazaki

Aggravation of collagen-induced arthritis by orally administered Porphyromonas gingivalis through modulation of the gut microbiota and gut immune system

Sci. Rep., 7 (1) (2017 Jul 31), p. 6955, [10.1038/s41598-017-07196-7](https://doi.org/10.1038/s41598-017-07196-7)

[\\_View PDF\\_](#)

This article is free to access.

[View in Scopus](#)[Google Scholar](#)

8. [8]

Z. Cheng, T. Do, K. Mankia, J. Meade, L. Hunt, V. Clerehugh, A. Speirs, A. Tugnait, P. Emery, D. Devine

Dysbiosis in the oral microbiomes of anti-CCP positive individuals at risk of developing rheumatoid arthritis

Ann. Rheum. Dis., 80 (2) (2021 Feb), pp. 162-168, [10.1136/annrheumdis-2020-216972](https://doi.org/10.1136/annrheumdis-2020-216972)

[View article\\_](#)

[View in Scopus](#)[Google Scholar](#)

9. [9]

K. Eriksson, G. Fei, A. Lundmark, D. Benchimol, L. Lee, Y.O.O. Hu, A. Kats, S. Saevarsdottir, A.I. Catarina, B. Klinge, A.F. Andersson, L. Klareskog, K. Lundberg, L. Jansson, T. Yucel-Lindberg

Periodontal health and oral microbiota in patients with rheumatoid arthritis

J. Clin. Med., 8 (5) (2019 May 8), p. 630, [10.3390/jcm8050630](https://doi.org/10.3390/jcm8050630)

[View article\\_](#)

[View in Scopus](#)[Google Scholar](#)

10. [10]



X.J. Chu, N.W. Cao, H.Y. Zhou, X. Meng, B. Guo, H.Y. Zhang, B.Z. Li

### The oral and gut microbiome in rheumatoid arthritis patients: a systematic review

Rheumatology, 60 (3) (2021 Mar 2), pp. 1054-1066, [10.1093/rheumatology/keaa835](https://doi.org/10.1093/rheumatology/keaa835)

[\\_View PDF\\_](#)

This article is free to access.

[View in Scopus](#)[Google Scholar](#)

11. [11]

R.R. Nayak, M. Alexander, I. Deshpande, K. Stapleton-Gray, B. Rimal, A.D. Patterson, C. Ubeda, J.U. Scher, P.J. Turnbaugh

### Methotrexate impacts conserved pathways in diverse human gut bacteria leading to decreased host immune activation

Cell Host Microbe, 29 (3) (2021 Mar 10), pp. 362-377, [10.1016/j.chom.2020.12.008](https://doi.org/10.1016/j.chom.2020.12.008)

e11

[\\_View PDF\\_](#)

This article is free to access.

[View in Scopus](#)[Google Scholar](#)

12. [12]

M.A. Lopez-Olivo, H.R. Siddhanamatha, B. Shea, P. Tugwell, G.A. Wells, M.E. Suarez-Almazor

### Methotrexate for treating rheumatoid arthritis

Cochrane Database Syst. Rev., 2014 (6) (2014 Jun 10),

Article CD000957, [10.1002/14651858.CD000957](https://doi.org/10.1002/14651858.CD000957)

[View article\\_](#)

[View in Scopus](#)[Google Scholar](#)

13. [13]

A. Artacho, S. Isaac, R. Nayak, A. Flor-Duro, M. Alexander, I. Koo, J. Manasson, P.B. Smith, P. Rosenthal, Y. Homsy, P. Gulko, J. Pons, L. Puchades-Carrasco, P. Izmirly, A. Patterson, S.B. Abramson, A. Pineda-Lucena, P.J. Turnbaugh, C. Ubeda, J.U. Scher

### The pretreatment gut microbiome is associated with lack of response to methotrexate in new-onset rheumatoid arthritis

Arthritis Rheumatol., 73 (6) (2021 Jun), pp. 931-942, [10.1002/art.41622](https://doi.org/10.1002/art.41622)

[View article\\_](#)

[View in Scopus](#)[Google Scholar](#)

14. [14]

C. Romero-Sanchez, C. Rodríguez, P. Santos-Moreno, A.M. Mesa, G.I. Lafaurie, Q.S. Giraldo, J. De-Avila, D.M. Castillo, M. Duran, P.C. Chalem, J.M. Bello Gualtero, R. Valle-Oñate

### Is the treatment with biological or non-biological DMARDs a modifier of periodontal condition in patients with rheumatoid arthritis?

Curr. Rheumatol. Rev., 13 (2) (2017), pp. 139-151, [10.2174/1573397113666170407161520](https://doi.org/10.2174/1573397113666170407161520)

[View article\\_](#)  
[View in ScopusGoogle Scholar](#)

15. [15]

P.M. Lübcke, M.N.B. Ebbers, J. Volzke, J. Bull, S. Kneitz, R. Engelmann, H. Lang, B. Kreikemeyer, B. Müller-Hilke

Periodontal treatment prevents arthritis in mice and methotrexate ameliorates periodontal bone loss

Sci. Rep., 9 (1) (2019 May 31), p. 8128, [10.1038/s41598-019-44512-9](https://doi.org/10.1038/s41598-019-44512-9)

[\\_View PDF\\_](#)

This article is free to access.

[View in ScopusGoogle Scholar](#)

16. [16]

L.G. Pinto, J. Talbot, R.S. Peres, R.F. Franca, S.H. Ferreira, B. Ryffel, J.C. Aves-Filho, F. Figueiredo, T.M. Cunha, F.Q. Cunha

Joint production of IL-22 participates in the initial phase of antigen-induced arthritis through IL-1 $\beta$  production

Arthritis Res. Ther., 17 (1) (2015 Sep 2), p. 235, [10.1186/s13075-015-0759-2](https://doi.org/10.1186/s13075-015-0759-2)

[\\_View PDF\\_](#)

This article is free to access.

[View in ScopusGoogle Scholar](#)

17. [17]

R.S. Peres, F.Y. Liew, J. Talbot, V. Carregaro, R.D. Oliveira, S.L. Almeida, R.F. França, P.B. Donate, L.G. Pinto, F.I. Ferreira, D.L. Costa, D.P. Demarque, D.R. Gouvea, N.P. Lopes, R.H. Queiroz, J.S. Silva, F. Figueiredo, J.C. Alves-Filho, T.M. Cunha, S.H. Ferreira, P. Louzada-Junior, F.Q. Cunha

Low expression of CD39 on regulatory T cells as a biomarker for resistance to methotrexate therapy in rheumatoid arthritis

Proc. Natl. Acad. Sci. U. S. A., 112 (8) (2015 Feb 24), pp. 2509-2514, [10.1073/pnas.1424792112](https://doi.org/10.1073/pnas.1424792112)

[View article\\_](#)

[View in ScopusGoogle Scholar](#)

18. [18]

A.H. Schneider, C.C. Machado, F.P. Veras, A.G.M. Maganin, F.F.L. de Souza, L.C. Barroso, R.D.R. de Oliveira, J.C. Alves-Filho, T.M. Cunha, S.Y. Fukada, P. Louzada-Júnior, T.A. da Silva, F.Q. Cunha

Neutrophil extracellular traps mediate joint hyperalgesia induced by immune inflammation

Rheumatology, 60 (7) (2021 Jul 1), pp. 3461-3473, [10.1093/rheumatology/keaa794](https://doi.org/10.1093/rheumatology/keaa794)

[\\_View PDF\\_](#)

This article is free to access.

[View in ScopusGoogle Scholar](#)

19. [19]



J.G. Caporaso, C.L. Lauber, W.A. Walters, D. Berg-  
Lyons, J. Huntley, N. Fierer, S.M. Owens, J. Betley, L. Fraser, M. Bauer, N. Gormley, J.A. Gilbert, G. S  
mith, R. Knight

## Ultra-high-throughput microbial community analysis on the Illumina HiSeq and MiSeq platforms

ISME J., 6 (8) (2012 Aug), pp. 1621-1624, [10.1038/ismej.2012.8](https://doi.org/10.1038/ismej.2012.8)

[\\_View PDF\\_](#)

This article is free to access.

[View in Scopus](#)[Google Scholar](#)

20. [20]

B.J. Callahan, P.J. McMurdie, M.J. Rosen, A.W. Han, A.J. Johnson, S.P. Holmes

## DADA2: high-resolution sample inference from Illumina amplicon data

Nat. Methods, 13 (7) (2016 Jul), pp. 581-583, [10.1038/nmeth.3869](https://doi.org/10.1038/nmeth.3869)

[View article\\_](#)

[View in Scopus](#)[Google Scholar](#)

21. [21]

M.R. McLaren, B.J. Callahan

## Silva 138.1 Prokaryotic SSU Taxonomic Training Data Formatted for DADA2 [Data Set]

Zenodo (2021), [10.5281/zenodo.4587955](https://doi.org/10.5281/zenodo.4587955)

[View article\\_](#)

[Google Scholar](#)

22. [22]

P.J. McMurdie, S. Holmes

## phyloseq: an R package for reproducible interactive analysis and graphics of microbiome census data

PLoS One, 8 (4) (2013 Apr 22), Article e61217, [10.1371/journal.pone.0061217](https://doi.org/10.1371/journal.pone.0061217)

[View article\\_](#)

[View in Scopus](#)[Google Scholar](#)

23. [23]

B.J. Callahan, K. Sankaran, J.A. Fukuyama, P.J. McMurdie, S.P. Holmes

## Bioconductor workflow for microbiome data analysis: from raw reads to community analyses

F1000Res, 5 (2016 Jun 24), p. 1492, [10.12688/f1000research.8986.2](https://doi.org/10.12688/f1000research.8986.2)

[View article\\_](#)

[View in Scopus](#)[Google Scholar](#)

24. [24]

J.F. Oksanen, G. Blanchet, M. Friendly, R. Kindt, P. Legendre, D. McGlenn, P.R. Minchin, R.B. O'Hara,  
G.L. Simpson, P. Solymos, M.H.H. Stevens, E. Szoecs, H. Wagner

vegan: community Ecology Package. R package version 2.5-7

<https://CRAN.R-project.org/package=vegan> (2020)

[Google Scholar](#)

25. [25]

M.I. Love, W. Huber, S. Anders

Moderated estimation of fold change and dispersion for RNA-seq data with DESeq2

Genome Biol., 15 (12) (2014), p. 550, [10.1186/s13059-014-0550-8](https://doi.org/10.1186/s13059-014-0550-8)

[\\_View PDF\\_](#)

This article is free to access.

[View in Scopus](#)[Google Scholar](#)

26. [26]

K.A. Lê Cao, M.E. Costello, V.A. Lakis, F. Bartolo, X.Y. Chua, R. Brazeilles, P. Rondeau

MixMC: a multivariate statistical framework to gain insight into microbial communities

PLoS One, 11 (8) (2016 Aug 11), Article e0160169, [10.1371/journal.pone.0160169](https://doi.org/10.1371/journal.pone.0160169)

[View article\\_](#)

[Google Scholar](#)

27. [27]

M. Maciejewski, C. Sands, N. Nair, S. Ling, S. Verstappen, K. Hyrich, A. Barton, D. Ziemek, M.R. Lewis, D. Plant

Prediction of response of methotrexate in patients with rheumatoid arthritis using serum lipidomics

Sci. Rep., 11 (1) (2021 Mar 31), p. 7266, [10.1038/s41598-021-86729-7](https://doi.org/10.1038/s41598-021-86729-7)

[\\_View PDF\\_](#)

This article is free to access.

[View in Scopus](#)[Google Scholar](#)

28. [28]

M.P.M. Letertre, N. Munjoma, K. Wolfer, A. Pechlivanis, J.A.K. McDonald, R.N. Hardwick, N.J. Cherrington, M. Coen, J.K. Nicholson, L. Hoyles, J.R. Swann, I.D. Wilson

A two-way interaction between methotrexate and the gut microbiota of male Sprague-Dawley rats

J. Proteome Res., 19 (8) (2020 Aug 7), pp. 3326-3339, [10.1021/acs.jproteome.0c00230](https://doi.org/10.1021/acs.jproteome.0c00230)

[\\_View PDF\\_](#)

This article is free to access.

[View in Scopus](#)[Google Scholar](#)

29. [29]

J.D. Corrêa, A.M. Saraiva, C.M. Queiroz-Junior, M.F. Madeira, P.M. Duarte, M.M. Teixeira, D.G. Souza, T.A. da Silva

Arthritis-induced alveolar bone loss is associated with changes in the composition of oral microbiota

Anaerobe, 39 (2016 Jun), pp. 91-96, [10.1016/j.anaerobe.2016.03.006](https://doi.org/10.1016/j.anaerobe.2016.03.006)  
[View PDF](#)[View article](#)[View in Scopus](#)[View in Google Scholar](#)

30. [30]

O.J. Park, H. Yi, J.H. Jeon, S.S. Kang, K.T. Koo, K.Y. Kum, J. Chun, C.H. Yun, S.H. Han

Pyrosequencing analysis of subgingival microbiota in distinct periodontal conditions

J. Dent. Res., 94 (7) (2015 Jul), pp. 921-927, [10.1177/0022034515583531](https://doi.org/10.1177/0022034515583531)

[View PDF](#)

This article is free to access.

[View in Scopus](#)[View in Google Scholar](#)

31. [31]

A.L. Griffen, C.J. Beall, J.H. Campbell, N.D. Firestone, P.S. Kumar, Z.K. Yang, M. Podar, E.J. Leys

Distinct and complex bacterial profiles in human periodontitis and health revealed by 16S pyrosequencing

ISME J., 6 (6) (2012 Jun), pp. 1176-1185, [10.1038/ismej.2011.191](https://doi.org/10.1038/ismej.2011.191)

[View PDF](#)

This article is free to access.

[View in Scopus](#)[View in Google Scholar](#)

32. [32]

A.L. Buschhart, L. Bolten, J. Volzke, K. Ekat, S. Kneitz, S. Mikkat, B. Kreikemeyer, B. Müller-Hilke

Periodontal pathogens alter the synovial proteome. Periodontal pathogens do not exacerbate macroscopic arthritis but alter the synovial proteome in mice

PLoS One, 15 (12) (2020 Dec 31), Article e0242868, [10.1371/journal.pone.0242868](https://doi.org/10.1371/journal.pone.0242868)

[View article](#)

[View in Scopus](#)[View in Google Scholar](#)

33. [33]

P. Coit, A.H. Sawalha

The human microbiome in rheumatic autoimmune diseases: a comprehensive review

Clin. Immunol., 170 (2016 Sep), pp. 70-79, [10.1016/j.clim.2016.07.026](https://doi.org/10.1016/j.clim.2016.07.026)

[View PDF](#)[View article](#)[View in Scopus](#)[View in Google Scholar](#)

34. [34]

V. Joshi, C. Matthews, M. Aspiras, M. de Jager, M. Ward, P. Kumar

Smoking decreases structural and functional resilience in the subgingival ecosystem

J. Clin. Periodontol., 41 (11) (2014 Nov), pp. 1037-1047, [10.1111/jcpe.12300](https://doi.org/10.1111/jcpe.12300)

[View article](#)

[View in Scopus](#)[View in Google Scholar](#)

35. [35]

N. Segata, S.K. Haake, P. Mannon, K.P. Lemon, L. Waldron, D. Gevers, C. Huttenhower, J. Izard

Composition of the adult digestive tract bacterial microbiome based on seven mouth surfaces, tonsils, throat and stool samples

Genome Biol., 13 (6) (2012 Jun 14), p. R42, [10.1186/gb-2012-13-6-r42](https://doi.org/10.1186/gb-2012-13-6-r42)

[\\_View PDF\\_](#)

This article is free to access.

[View in Scopus](#)[Google Scholar](#)

36. [36]

K. Arimatsu, H. Yamada, H. Miyazawa, T. Minagawa, M. Nakajima, M.I. Ryder, K. Gotoh, D. Motooka, S. Nakamura, T. Iida, K. Yamazaki

Oral pathobiont induces systemic inflammation and metabolic changes associated with alteration of gut microbiota

Sci. Rep., 4 (2014 May 6), p. 4828, [10.1038/srep04828](https://doi.org/10.1038/srep04828)

[\\_View PDF\\_](#)

This article is free to access.

[View in Scopus](#)[Google Scholar](#)

37. [37]

T.J. King, K.R. Georgiou, J.C. Cool, M.A. Scherer, E.S. Ang, B.K. Foster, J. Xu, C.J. Xian

Methotrexate chemotherapy promotes osteoclast formation in the long bone of rats via increased pro-inflammatory cytokines and enhanced NF- $\kappa$ B activation

Am. J. Pathol., 181 (1) (2012 Jul), pp. 121-129, [10.1016/j.ajpath.2012.03.037](https://doi.org/10.1016/j.ajpath.2012.03.037)

[View PDF](#)[View article](#)[View in Scopus](#)[Google Scholar](#)

38. [38]

R. Rogier, H. Evans-Marin, J. Manasson, P.M. van der Kraan, B. Walgreen, M.M. Helsen, L.A. van den Bersselaar, F.A. van de Loo, P.L. van Lent, S.B. Abramson, W.B. van den Berg, M.I. Koenders, J.U. Scher, S. Abdollahi-Roodsaz

Alteration of the intestinal microbiome characterizes preclinical inflammatory arthritis in mice and its modulation attenuates established arthritis

Sci. Rep., 7 (1) (2017 Nov 15), p. 15613, [10.1038/s41598-017-15802-x](https://doi.org/10.1038/s41598-017-15802-x)

[\\_View PDF\\_](#)

This article is free to access.

[View in Scopus](#)[Google Scholar](#)

39. [39]

M.M. Zaiss, H.J. Joyce Wu, D. Mauro, G. Schett, F. Ciccia

The gut-joint axis in rheumatoid arthritis

Nat. Rev. Rheumatol., 17 (4) (2021 Apr), pp. 224-237, [10.1038/s41584-021-00585-3](https://doi.org/10.1038/s41584-021-00585-3)

[View article\\_](#)

[View in Scopus](#)[Google Scholar](#)

40. [40]

F. Magne, M. Gotteland, L. Gauthier, A. Zazueta, S. Pessoa, P. Navarrete, R. Balamurugan

The Firmicutes/Bacteroidetes ratio: a relevant marker of gut dysbiosis in obese patients?

Nutrients, 12 (5) (2020 May 19), p. 1474, [10.3390/nu12051474](#)

[View article](#)

[View in Scopus](#)[Google Scholar](#)

41. [41]

B. Zhou, X. Xia, P. Wang, S. Chen, C. Yu, R. Huang, R. Zhang, Y. Wang, L. Lu, F. Yuan, Y. Tian, Y. Fan, X. Zhang, Y. Shu, S. Zhang, D. Bai, L. Wu, H. Xu, L. Yang

Induction and amelioration of methotrexate-induced gastrointestinal toxicity are related to immune response and gut microbiota

EBioMedicine, 33 (2018 Jul), pp. 122-133, [10.1016/j.ebiom.2018.06.029](#)

[View PDF](#)[View article](#)[View in Scopus](#)[Google Scholar](#)

42. [42]

M.M. Newkirk, A. Zbar, M. Baron, A.R. Manges

Distinct bacterial colonization patterns of Escherichia coli subtypes associate with rheumatoid factor status in early inflammatory arthritis

Rheumatology, 49 (7) (2010 Jul), pp. 1311-1316, [10.1093/rheumatology/keq088](#)

[View PDF](#)

This article is free to access.

[View in Scopus](#)[Google Scholar](#)

43. [43]

J. Rovenský, M. Stancíková, K. Svík, J. Utesený, K. Bauerová, J. Jurcovicová

Treatment of adjuvant-induced arthritis with the combination of methotrexate and probiotic bacteria Escherichia coli O83 (Colinfant)

Folia Microbiol., 54 (4) (2009), pp. 359-363, [10.1007/s12223-009-0045-2](#)

[View article](#)

[View in Scopus](#)[Google Scholar](#)

44. [44]

J. Rovenský, K. Svík, V. Matha, R. Istok, V. Kamarád, L. Ebringer, M. Ferencík, M. Stancíková

Combination treatment of rat adjuvant-induced arthritis with methotrexate, probiotic bacteria Enterococcus faecium, and selenium

Ann. N. Y. Acad. Sci., 1051 (2005 Jun), pp. 570-581, [10.1196/annals.1361.101](#)

[View article](#)

[View in Scopus](#)[Google Scholar](#)

45. [45]

H. Xu, H. Zhao, D. Fan, M. Liu, J. Cao, Y. Xia, D. Ju, C. Xiao, Q. Guan

Interactions between gut microbiota and immunomodulatory cells in rheumatoid arthritis

Mediat. Inflamm., 2020 (2020 Sep 9), Article 1430605, [10.1155/2020/1430605](https://doi.org/10.1155/2020/1430605)

[View article\\_](#)

[View in ScopusGoogle Scholar](#)

46. [46]

H. Yan, R. Su, H. Xue, C. Gao, X. Li, C. Wang

Pharmacomicrobiology of methotrexate in rheumatoid arthritis: gut microbiome as predictor of therapeutic response

Front. Immunol., 12 (2021 Dec 16), Article 789334, [10.3389/fimmu.2021.789334](https://doi.org/10.3389/fimmu.2021.789334)

[View article\\_](#)

[View in ScopusGoogle Scholar](#)

47. [47]

S.M. Farooq, H.M. Ashour

Type II collagen-specific B cells induce immune tolerance in Th1-Skewed, Th2-Skewed, and arthritis-prone strains of mice

Cells, 10 (4) (2021 Apr 12), p. 870, [10.3390/cells10040870](https://doi.org/10.3390/cells10040870)

[View article\\_](#)

[View in ScopusGoogle Scholar](#)

## Cited by (1)

- [Methotrexate regimen and periodontal therapy change the oral-gut microbiota composition in rheumatoid arthritis](#)  
2022, Research Square

[View Abstract](#)

© 2022 Elsevier Ltd. All rights reserved.
